# Supplementary material
Source: JCI journal article supplement (doi:10.1172/jci198349)
Supplement: sd1 [file 1]

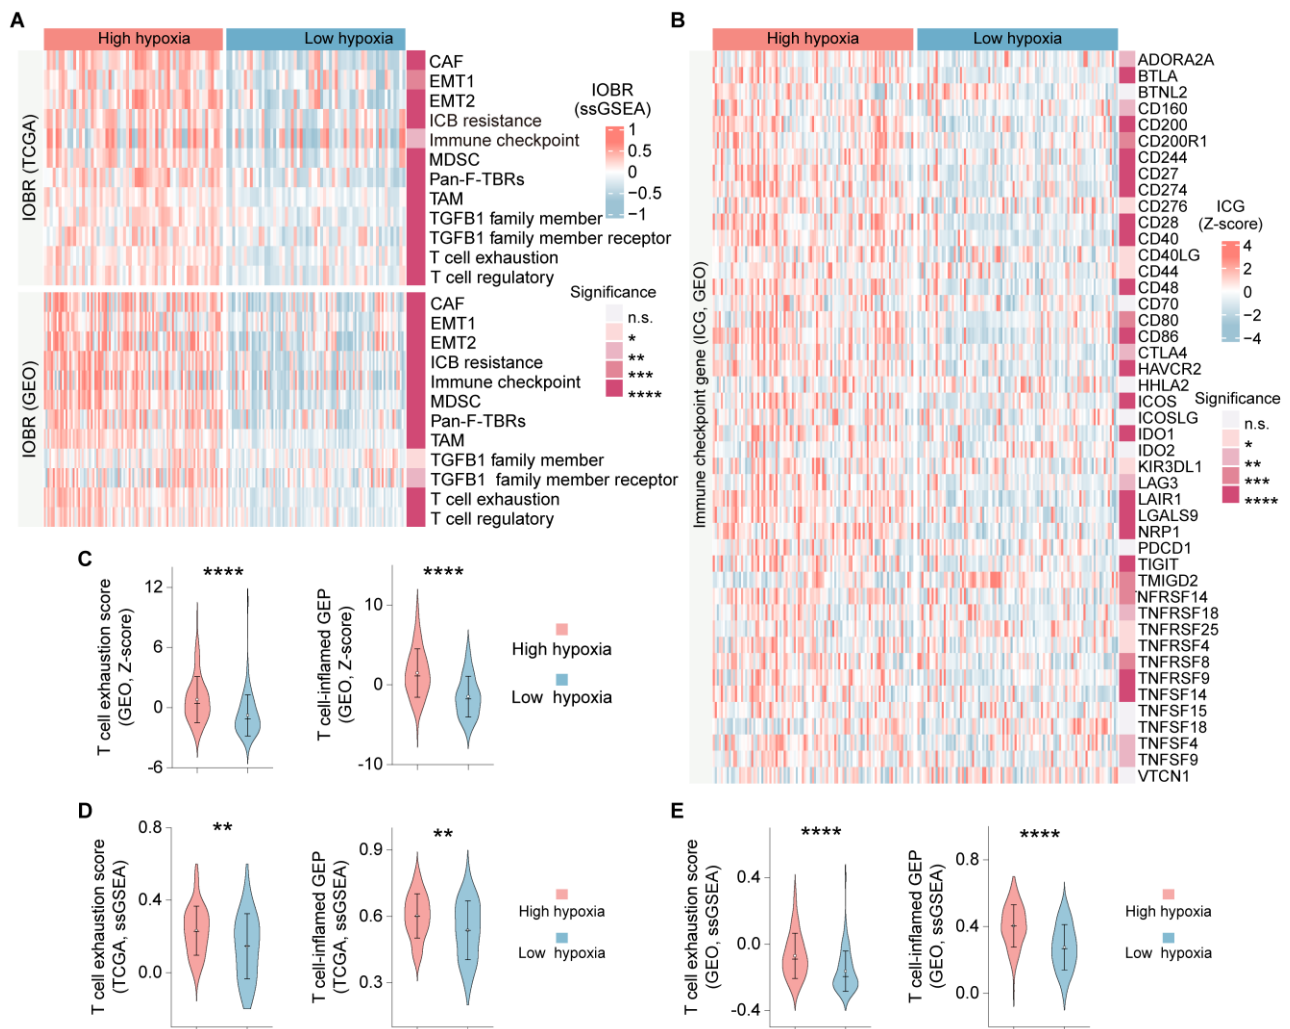

**Supplemental Figure 1. Immunological characterization of patients with TNBC stratified by hypoxia status. (A)** Heatmap depicting IOBR-derived functional signatures in TNBC samples stratified by high- and low-hypoxia status from the TCGA and GEO cohorts. **(B)** Heatmap depicting normalized expression of 45 immune checkpoint genes (ICGs) in TNBC samples stratified by high- and low-hypoxia status from the GEO dataset. **(C-E)** Comparison of T cell exhaustion scores and T cell inflamed gene expression profile (GEP) between high- and low-hypoxia TNBC groups in the TCGA and GEO dataset. Statistical analyses were performed using Wilcoxon's rank-sum test. n.s.: no significance; \* $P < 0.05$ ; \*\* $P < 0.01$ ; \*\*\* $P < 0.001$ ; \*\*\*\* $P < 0.0001$ .

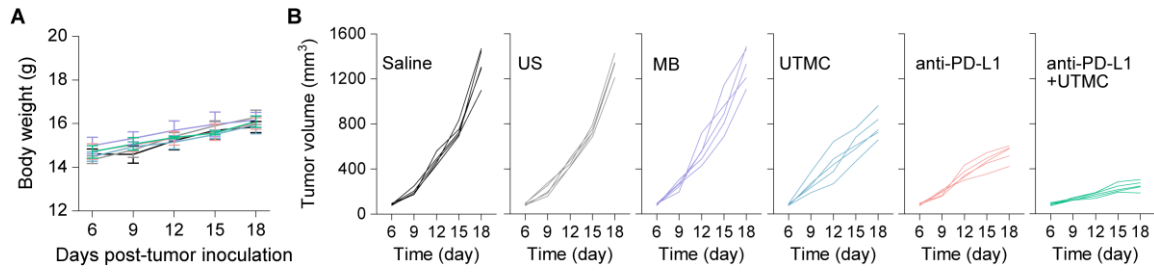

**Supplemental Figure 2. Body weight and tumor growth dynamics in 4T1 tumor-bearing mice following the indicated treatments. (A) Body weight changes of 4T1 tumor-bearing mice following various treatments. (B) Individual tumor growth curves in mice subjected to different treatments (n = 5 per group).**

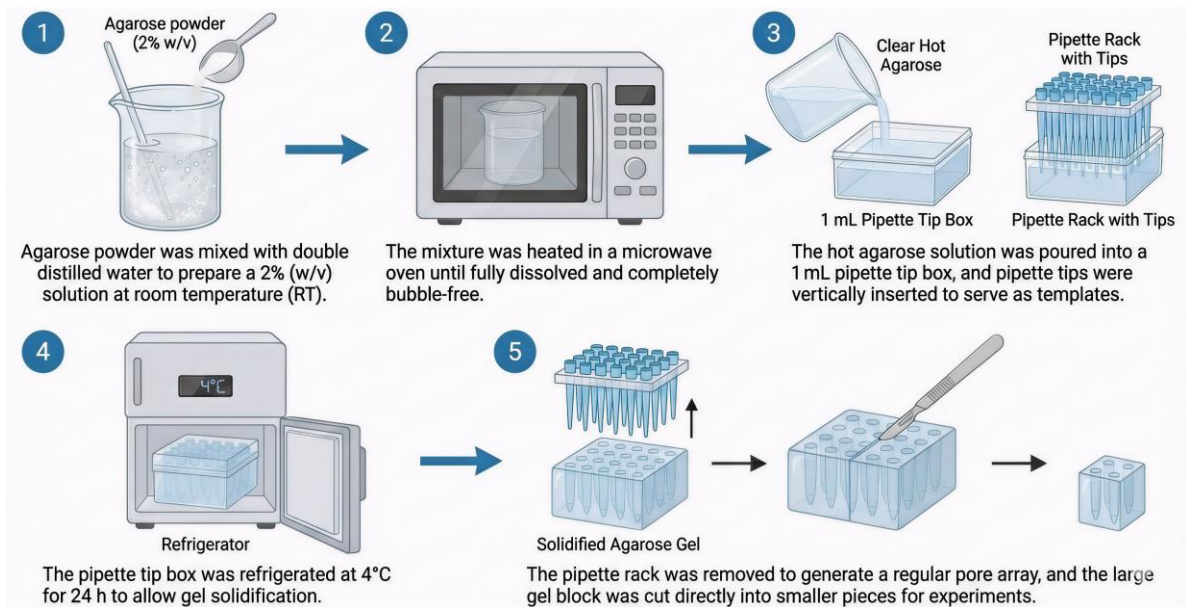

**Supplemental Figure 3. Agarose phantom preparation workflow.**

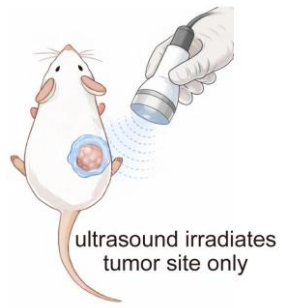

**Supplemental Figure 4. Schematic illustration of ultrasound irradiation treatment.**

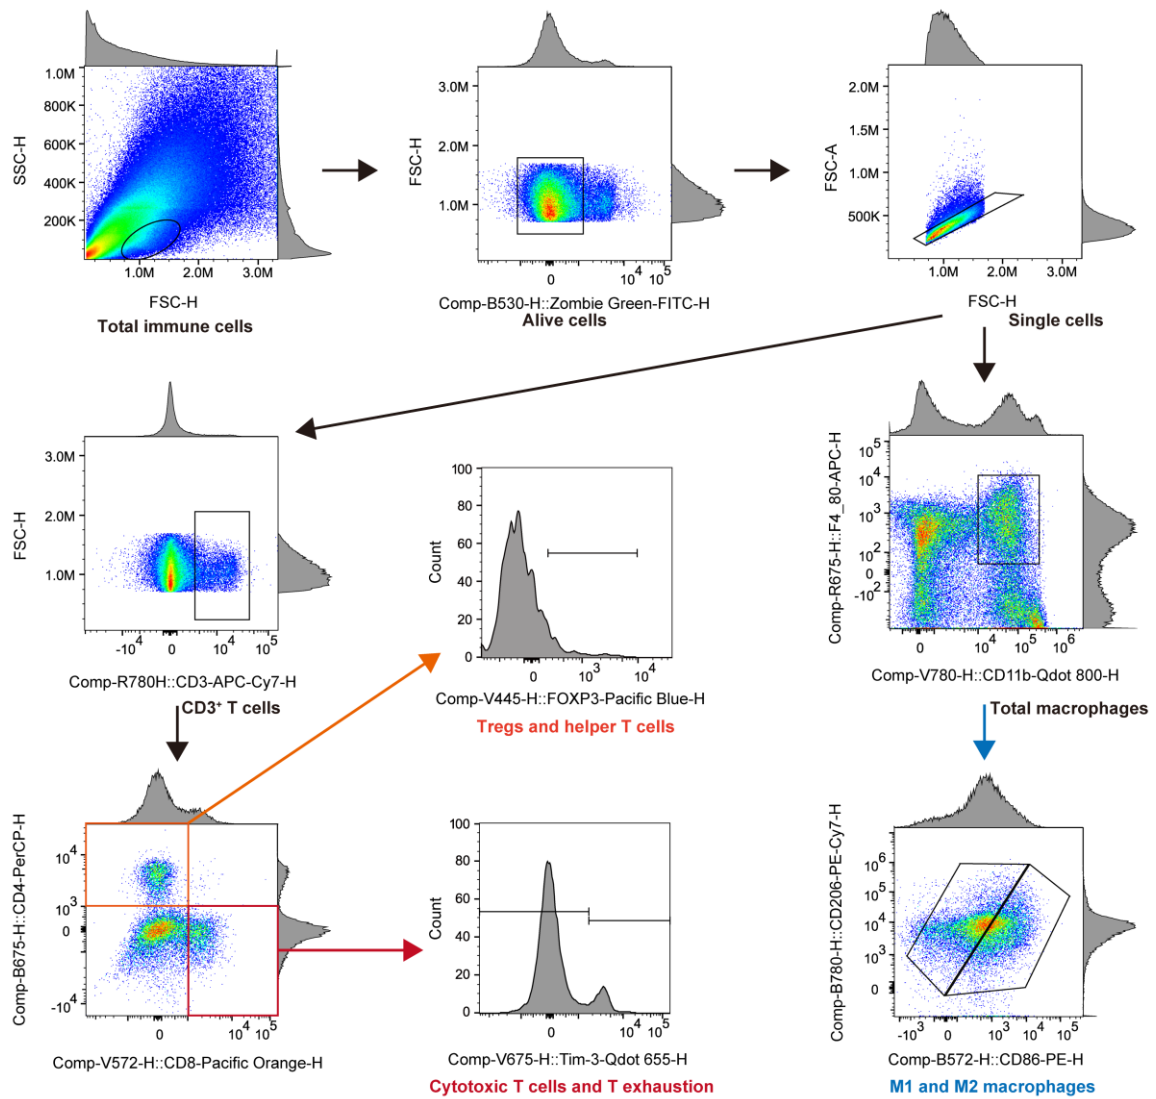

**Supplemental Figure 5. Gating strategy for flow cytometry analysis of tumor-infiltrating immune cells in vivo.**

| Variables | Type | HR    | <i>P</i> value | SE    | Low  | High |
|-----------|------|-------|----------------|-------|------|------|
| Hypoxia   | OS   | 0.969 | 0.947          | 0.466 | 0.39 | 2.4  |
| Hypoxia   | DSS  | 1.06  | 0.916          | 0.56  | 0.35 | 3.2  |
| Hypoxia   | PFI  | 0.619 | 0.264          | 0.43  | 0.27 | 1.4  |

**Supplemental Table 1. Cox proportional hazards analysis evaluating the association between hypoxia status and clinical outcomes in patients with TNBC from TCGA.** OS, overall survival; DSS, disease-specific survival; PFI, progression-free interval; HR, hazard ratio; SE, standard error.

| <b>Gene</b> | <b>Trimer sequence (5'-3')</b> | <b>Primer direction</b> |
|-------------|--------------------------------|-------------------------|
| GNAQ        | TGGGTCAGGATACTCTGATGAAG        | forward primer          |
|             | TGTGCATGAGCCTTATTGTGC          | reverse primer          |
| GNA11       | GGCTTCACCAAGCTCGTCTAC          | forward primer          |
|             | CACTGACGTACTGATGCTCG           | reverse primer          |
| GNAS        | TGCCTCGGGAACAGTAAGAC           | forward primer          |
|             | GCCGCCCTCTCCATTAAC             | reverse primer          |

**Supplemental Table 2. Primer sequences used for quantitative real-time PCR (qRT-PCR).**

| <b>Gene</b> | <b>Target Sequence (5'-3')</b> | <b>siRNA strand</b> |
|-------------|--------------------------------|---------------------|
| GNAQ        | CCACAGACACCGAGAAUAUTT          | Sense               |
|             | AUAUUCUCGGUGUCUGUGGTT          | antisense           |
| GNAQ        | CAAUAAGGCUCAUGCACAATT          | Sense               |
|             | UUGUGCAUGAGCCUUAUUGTT          | antisense           |
| GNAQ        | CCACAGGGAUCAUCGAAUATT          | Sense               |
|             | UAUUCGAUGAUCCCUGUGGTT          | antisense           |
| GNA11       | GGGAGGUGGACGUGGAGAATT          | Sense               |
|             | UUCUCCACGUCCACCUCCTT           | antisense           |
| GNA11       | GGGAAGAGCACGUUCAUCATT          | Sense               |
|             | UGAUGAACGUGCUCUCCCTT           | antisense           |
| GNA11       | AGGACCUGCUGGAGGACAATT          | Sense               |
|             | UUGUCCUCCAGCAGGUCCUTT          | antisense           |
| GNAS        | GCAUGUAAUGGGUUUAUUTT           | Sense               |
|             | AUAAAACCCAUAACAUGCTT           | antisense           |
| GNAS        | CUGAAAGAGGCGAUUGAAATT          | Sense               |
|             | UUUCAAU CGCCUCUUCAGTT          | antisense           |
| GNAS        | GAAGAUUGAGGACUACUUUTT          | Sense               |
|             | AAAGUAGUCCUCAAUUCUUCTT         | antisense           |

**Supplemental Table 3. Sequences of siRNAs used for gene knockdown experiments.**
